# Supplementary material for: Multicomponent reactions provide key molecules for secret communication
Source: PubMed Central journal article supplement (PMC5897361; doi:10.1038/s41467-018-03784-x), 2018-04-12
Supplement: 41467_2018_3784_MOESM3_ESM.pdf [file 41467_2018_3784_MOESM3_ESM.pdf]

## **Description of Additional Supplementary Files**

**File Name: Supplementary Data 1**

**Description:** The “list of components” used to create the library of compounds.

**File Name: Supplementary Data 2**

**Description:** The encrypted Texts/Files.

**File Name: Supplementary Software 1**

**Description:** The “Analysis Script”.

**File Name: Supplementary Software 2**

**Description:** Executable of the “Molecular Encryption Script – AES”.
